# Supplementary material for: Meta-analysis methods for combining multiple expression profiles: comparisons, statistical characterization and an application guideline
Source: PubMed Central journal article supplement (PMC3898528; doi:10.1186/1471-2105-14-368), 2013-12-21
Supplement: 1471-2105-14-368-S1.pdf [file 1471-2105-14-368-S1.pdf]

# Supplementary methods

## Adaptive weighted (AW) Fisher

For Fisher, Stouffer and minP methods targeted on  $HS_B$ , candidate markers differentially expressed in one or more studies are detected with no indication of which studies are involved in differential expression. For example, Fishers method gives the same statistical significance for gene  $A$  with  $p$ -values= (0.1, 0.1, 0.1, 0.1) and gene  $B$  with  $p$ -values= (0.0001, 1, 1, 1); the two genes, however, have very different biological interpretations. The adaptively weighted Fishers method (AW) was developed to improve biological interpretation and statistical power. AW considered a weighted Fisher score  $U(w_1, \dots, w_k) = -2 \sum_k w_k \cdot \log p_k$  (where weight  $w_k$  equals 0 or 1) and the test statistic was defined as the smallest  $p$ -value of all  $2^k - 1$  possible weighted Fisher score (i.e.  $T^{AW} = \min_{w_1, \dots, w_K} p(U(w_1, \dots, w_K))$ ), where  $p(U(w_1, \dots, w_K))$  is the  $p$ -value of  $U(w_1, \dots, w_k)$ . The resulting best adaptive weight (i.e.  $W^* = \arg \min_{w_1, \dots, w_K} p(U(w_1, \dots, w_K))$ ) provides indication of which studies contribute to the statistical significance of meta-analysis. For example,  $w^* = (1, 1, 1, 1)$  for gene  $A$  shows statistical significance in all four studies and  $w^* = (1, 0, 0, 0)$  for gene  $B$  shows statistical significance in only the first study. AW method is admissible under classical two-sample Gaussian scenario and it generally has better statistical power than traditional Fisher and minP methods in various kinds of alternative hypothesis in  $HS_B$ . For more details, refer to Li and Tseng (2011).

## Combined statistical estimates (effect size) methods: FEM and REM

The meta-analysis method by combining effect sizes from several studies is a  $t$ -test based modeling approach. The effect size for a certain gene in the  $i^{th}$  study, and  $i = 1, 2, \dots, K$  is defined as  $d_i = \frac{\bar{T}_i - \bar{C}_i}{S_i}$ , where  $\bar{T}_i$ ,  $\bar{C}_i$  and  $S_i$  denote the means of treatment and control group and the estimate of the pooled standard deviation, respectively. An unbiased estimate for  $d_i$  is obtained as  $d'_i = d_i - 3d_i/(4(n_i - 2 - 1))$  and the estimated variance of the unbiased effect size is  $\hat{\sigma}_{d_i}^2 = (n_{it}^{-1} + n_{ic}^{-1}) + d_i^2((n_{it} + n_{ic}))^{-1}$ , where  $n_i = n_{it} + n_{ic}$  is the sample size in the  $i^{th}$  study;  $n_{it}$  and  $n_{ic}$  are the sample sizes of treatment and control group in the  $i^{th}$  study respectively. From the number of studies  $k$ , a hierarchical model is given as

$$\begin{aligned}d_i &= \theta_i + \varepsilon_i, \varepsilon_i \sim N(0, s_i^2) \\ \theta_i &= \mu + \delta_i, \delta_i \sim N(0, \tau^2)\end{aligned}$$

where  $s_i^2$  is the variance within certain study  $k$ ;  $\tau^2$  is the variance (random effect) between studies and  $\mu$  is the overall mean, which is the parameter of interest.  $d_i$  and  $s_i^2$  given by  $d_i'$  and  $\hat{\sigma}_{d_i}^2$  are described above.  $\tau^2 = 0$  means that there is no variance between studies, hence the hierarchical model reduces to a fixed effects model (FEM),  $d_i = \mu + \varepsilon_i$ ,  $\varepsilon_i \sim N(0, s_i^2)$ . Otherwise, the hierarchical model is a random effects model (REM),  $d_i = \mu + \delta_i + \varepsilon_i$ ,  $\varepsilon_i \sim N(0, s_i^2)$  and  $\delta_i \sim N(0, \tau^2)$ . The  $\hat{\tau}^2$  can be estimated by a method proposed by DerSimonian and Laird, 1986.

## Combined rank statistics methods: Rank Product (RankProd) and Rank Sum (RankSum)

Rank Product (RankProd) and Rank Sum (RankSum) methods are based on a biological common sense that if the same gene is repeatedly at the top of the list ordered by up- or down-regulated genes in replicate experiments, the gene will be more likely to be regarded as differentially expressed. Suppose there are  $n$  studies with  $(n_{iT}, n_{iC})$  replicates,  $i = 1, 2, \dots, k$ . Below is the algorithm of finding up-regulated differential genes from Rank Product method proposed by Hong et al (2006). In the beginning, the pair-wise ratios within each study of their fold-changes were calculated (i.e., for study  $i$ ,  $T_{ij}/C_{il}$ ,  $j = 1, 2, \dots, n_{iT}$ ,  $l = 1, 2, \dots, n_{iC}$ , and form  $k_i = n_{iT} \times n_{iC}$  comparisons:

- (1) Define the statistic of rank product  $RP_g^{up} = (\prod_i \prod_k r_{g,i,k}^{up})^{1/k}$ , where  $k = k_1 + k_2 + \dots + k_n$ , and  $r_{g,i,k}^{up}$  is the position of gene  $g$  in the list of genes in the  $i^{th}$  study under  $k^{th}$  comparison sorted by decreasing pair-wise ratios calculated before.
- (2) Do permutations in each array independently for  $B$  times and calculate the statistics  $RP_g^{up(1)}$ ,  $RP_g^{up(2)}$ , ...,  $RP_g^{up(B)}$ , the same in step (1).
- (3) The permutation  $p$ -value and FDR assessed by permutation within each gene can be obtained by

$$p_g = (1/GB) \sum_b \sum_g I(|RP_g^{up(b)}| \leq RP_g^{up})$$

$$FDR_g = \frac{(1/B) \sum_b \sum_g I(|RP_g^{up(b)}| \leq RP_g^{up})}{\sum_g I(|RP_g^{up(b)}| \leq RP_g^{up})}$$

In rank sum (RankSum) method, the statistic  $RS_g^{up} = (\sum_i \sum_k r_{g,i,k}^{up})^{1/k}$  was used to replace the statistic  $RP_g^{up}$  from the algorithm of rank product (RankProd) mentioned above. This method only considers gene ranks

rather than absolute expression values, which leads to its robustness against heterogeneity across different studies.

**Supplementary Figures**

**Supplementary Tables**

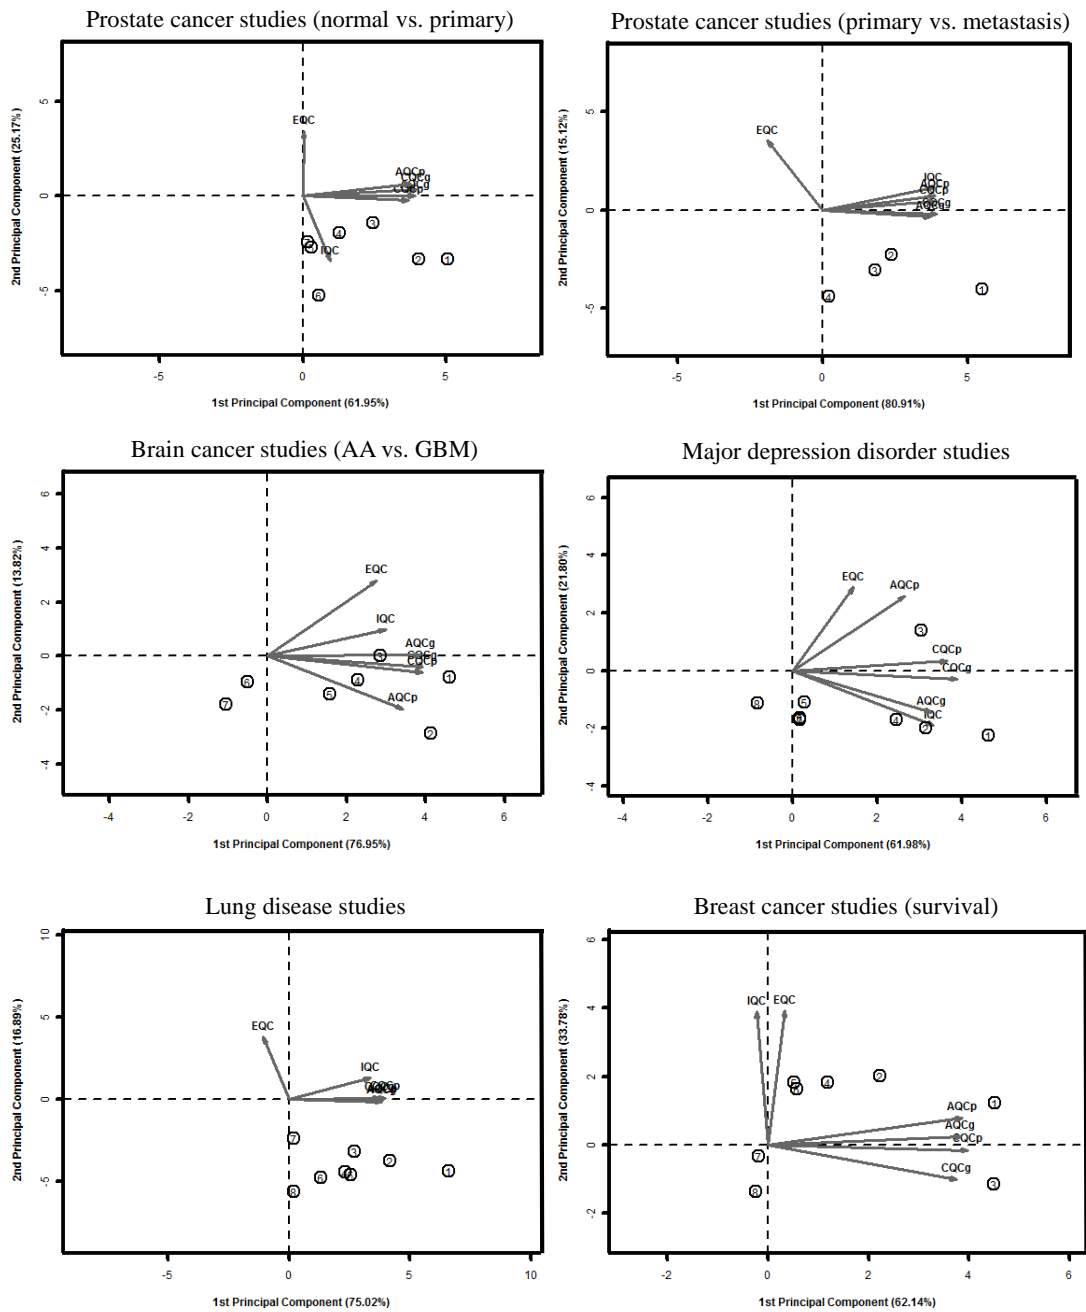

Figure S1: MetaQC

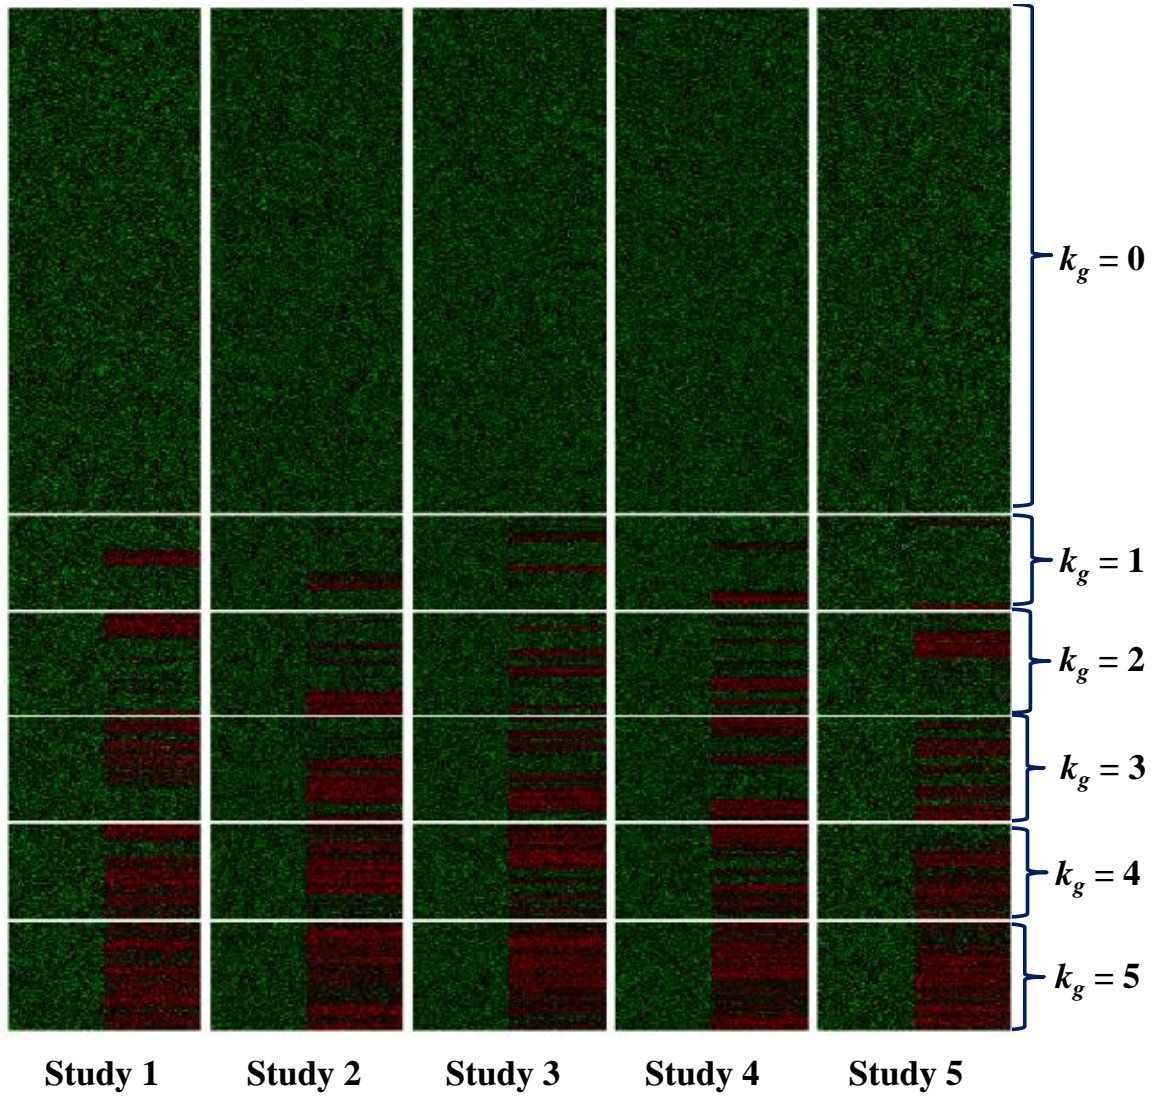

Figure S2: Heatmap of simulated example (red color represents up-regulated genes)

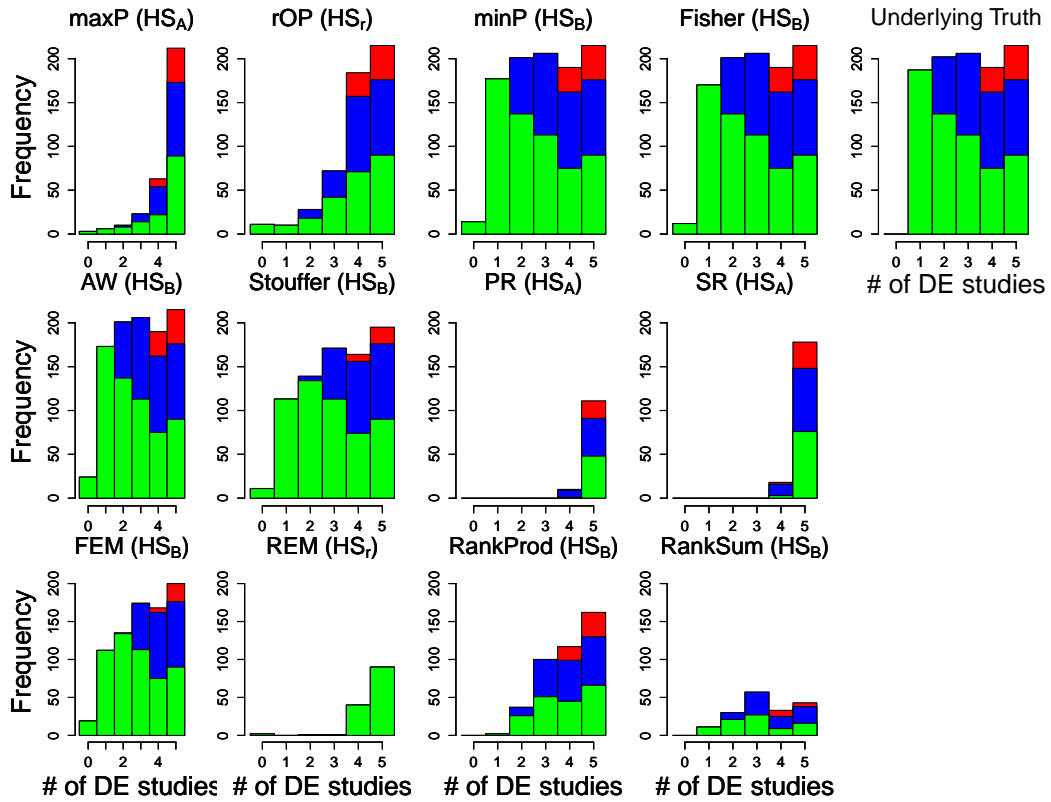

Figure S3: The histograms of the true number of DE studies among detected DE genes under FDR=5% in each method for discordance case (green color represents all concordance effect sizes; blue color represents one study has opposite effect size and red color represents two studies have opposite effect size).

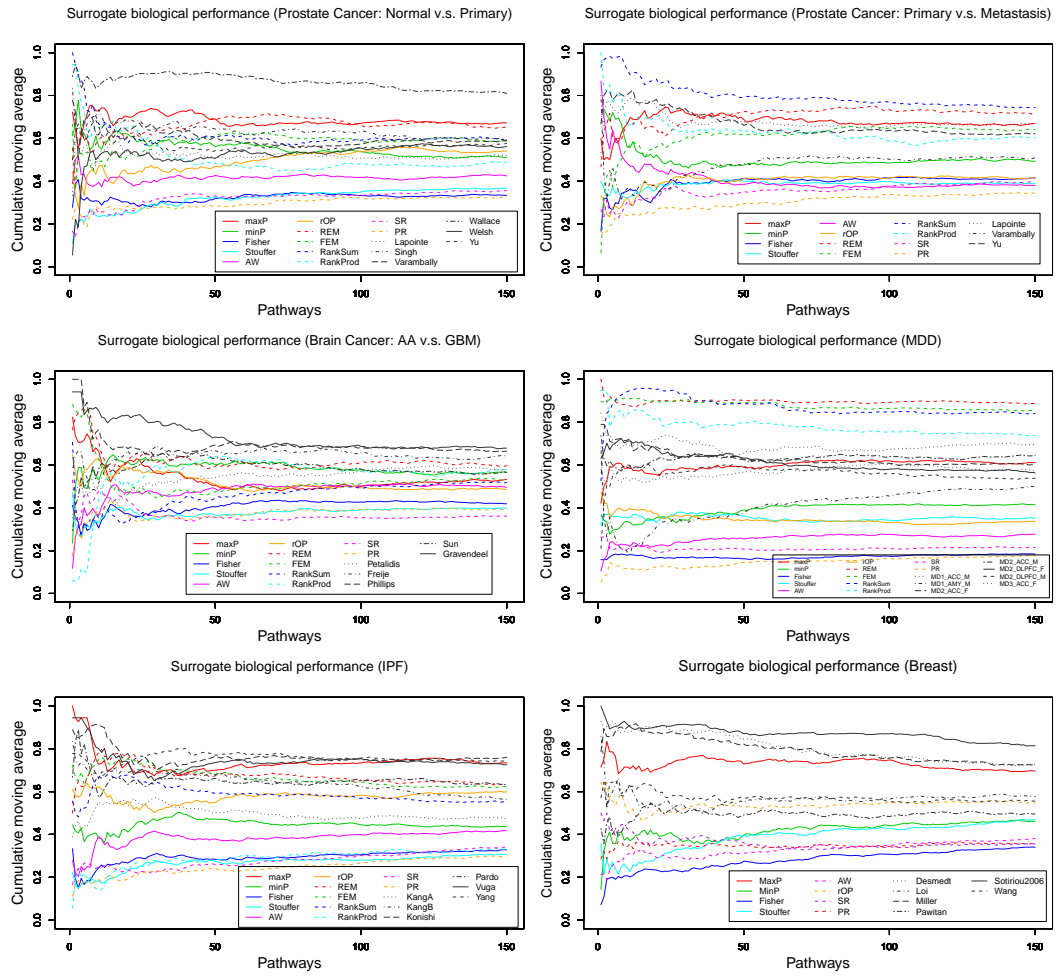

Figure S4: Cumulative moving average to determine  $D = 100$



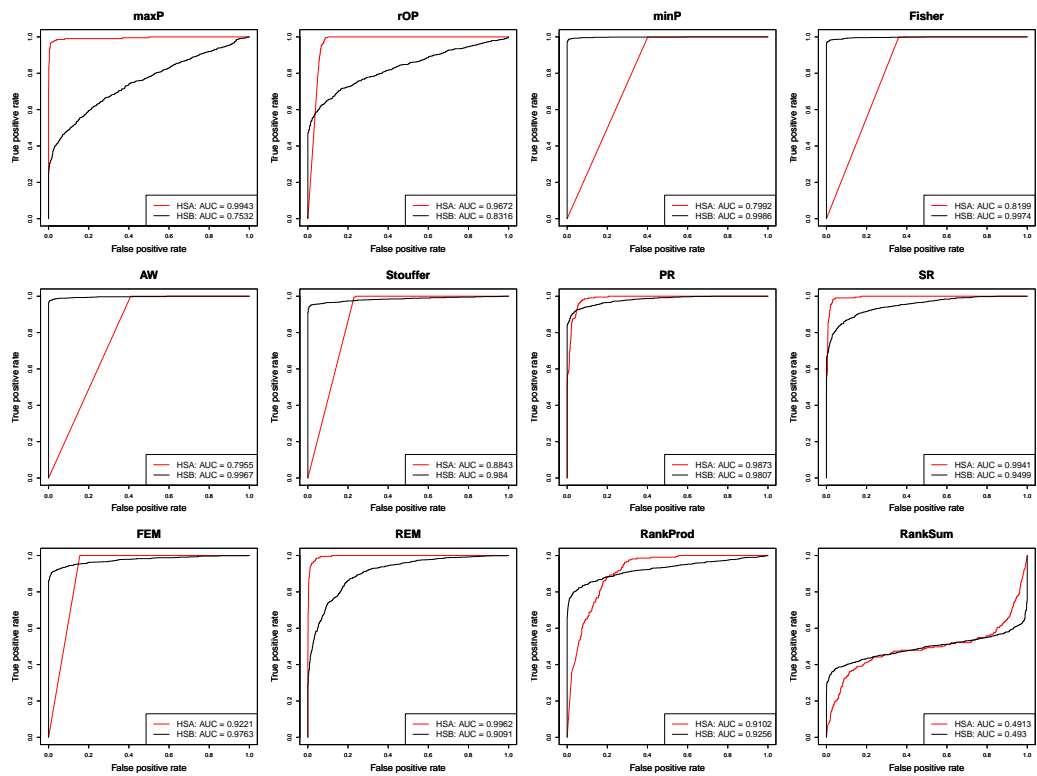

Figure S5: The ROC curves and AUC for the hypothesis settings of  $HS_A$ -type and (red line)  $HS_B$ -type (black line) in each meta-analysis method

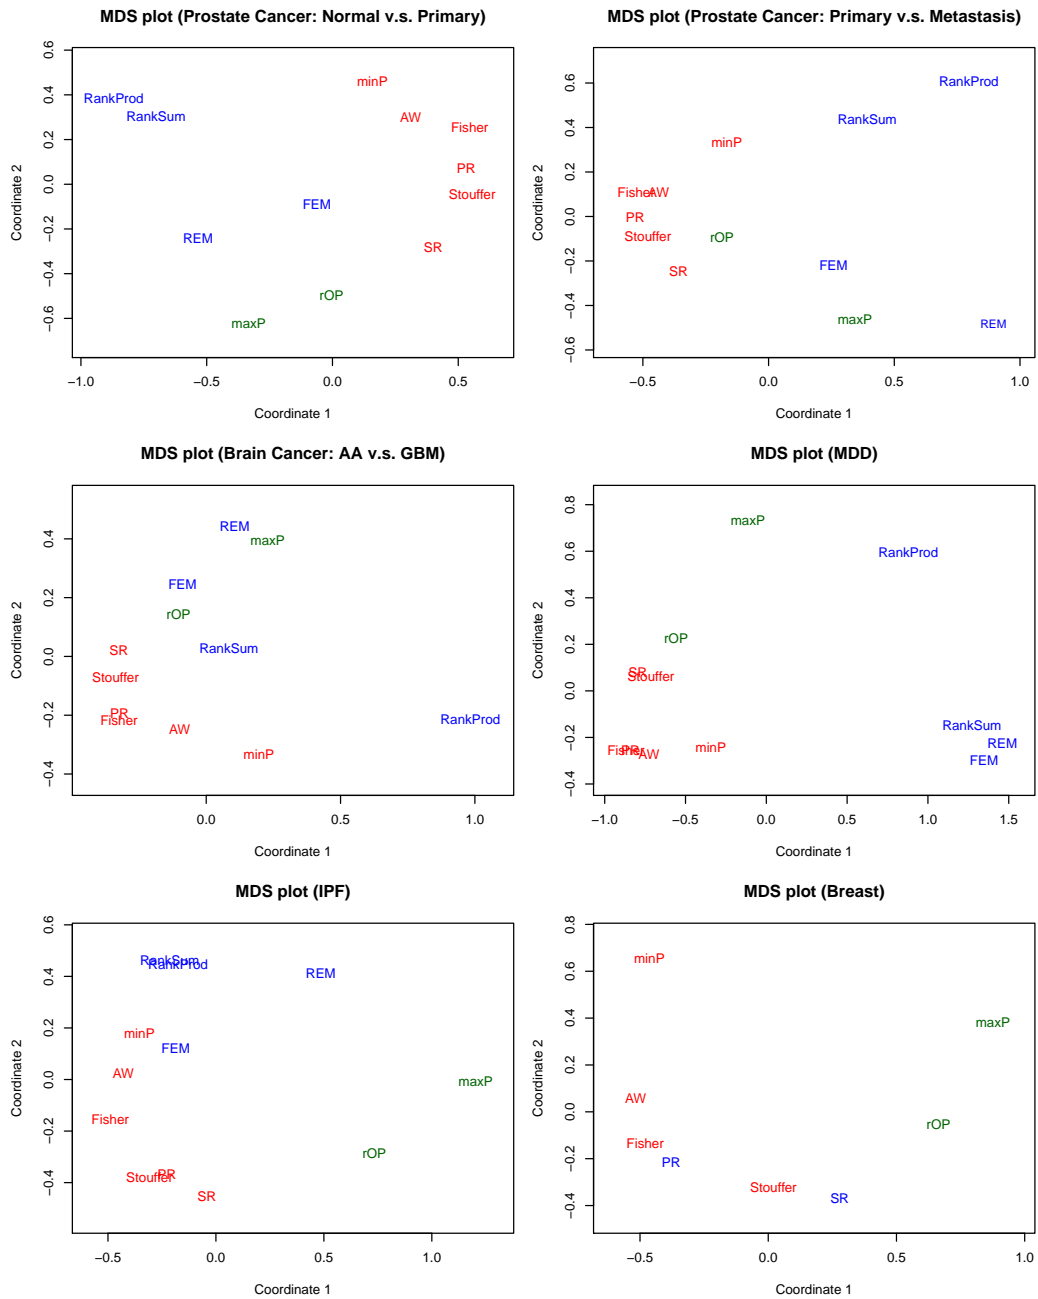

Figure S6: Multidimensional scaling (MDS) plots of individual data sets

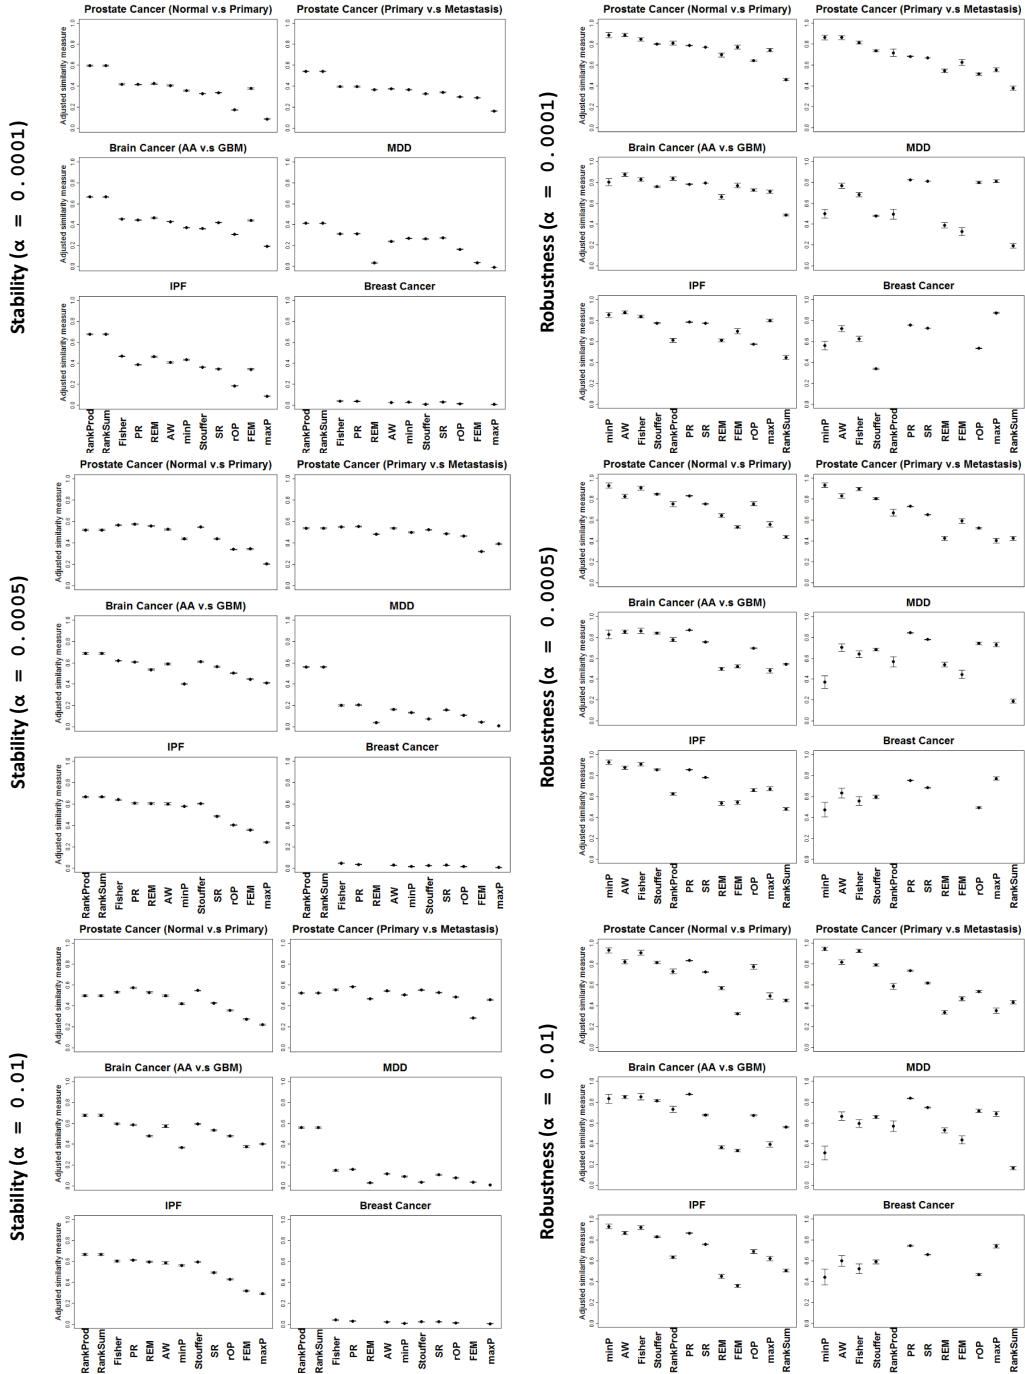

Figure S7: Stability and Robustness plot for  $\alpha = 0.0001, 0.005$  and  $0.01$

Table S1: Detailed data sets description

|                                                           | Author       | Year | Platform       | Sample Size<br>(Case/Controls) | Source                 |
|-----------------------------------------------------------|--------------|------|----------------|--------------------------------|------------------------|
| Prostate Cancer<br>Studies<br>(Normal v.s<br>Primary)     | Welsh        | 2001 | HG-U95A        | 34(25/9)                       | public.gnf.org/cancer/ |
|                                                           | Singh        | 2002 | HG-U95Av2      | 102(52/50)                     | www.broad.mit.edu      |
|                                                           | Lapointe     | 2004 | cDNA           | 103(62/41)                     | GSE3933                |
|                                                           | Yu           | 2004 | HG-U95Av2      | 83(65/18)                      | GSE6919                |
|                                                           | Varambally   | 2005 | HG-U133 Plus 2 | 13(7/6)                        | GSE3325                |
|                                                           | Wallace      | 2008 | HG-U133A2      | 89(69/20)                      | GSE6956                |
|                                                           | Nanni        | 2006 | HG-U133A       | 30(23/7)                       | GSE3868                |
| Prostate Cancer<br>Studies<br>(Primary v.s<br>Metastasis) | Lapointe     | 2004 | cDNA           | 71(62/9)                       | GSE3933                |
|                                                           | Varambally   | 2005 | HG-U133 Plus 2 | 13(7/6)                        | GSE3325                |
|                                                           | Yu           | 2004 | HG-U95Av2      | 90(65/25)                      | GSE6919                |
|                                                           | Tomlins      | 2006 | cDNA           | 49(30/19)                      | GSE6099                |
| Brain Cancer<br>Studies                                   | Freije       | 2004 | HG-U133A,B     | 85(59/26)                      | GSE4412                |
|                                                           | Phillips     | 2006 | HG-U133A,B     | 100(76/24)                     | GSE4271                |
|                                                           | Sun          | 2006 | HG-U133 Plus 2 | 100(81/19)                     | GSE4290                |
|                                                           | Petalidis    | 2008 | HG-U133A       | 58(39/19)                      | GSE1993                |
|                                                           | Gravendeel   | 2009 | HG-U133 Plus 2 | 175(159/16)                    | GSE16011               |
|                                                           | Paugh        | 2010 | HG-U133 Plus 2 | 42(33/9)                       | GSE19578               |
|                                                           | Yamanaka     | 2006 | Agilent        | 29(22/7)                       | GSE4381                |
| MDD Studies                                               | MD1_AMY      | 2009 | HG-U133 Plus 2 | 28(14/14)                      | Dr. Sibille            |
|                                                           | MD1_ACC      | 2009 | HG-U133 Plus 2 | 32(16/16)                      | Dr. Sibille            |
|                                                           | MD3_ACC      | 2009 | HumanHT-12     | 44(22/22)                      | Dr. Sibille            |
|                                                           | MD2_ACC_M    | 2010 | HG-U133 Plus 2 | 18(9/9)                        | Dr. Sibille            |
|                                                           | MD2_ACC_F    | 2010 | HG-U133 Plus 2 | 26(13/13)                      | Dr. Sibille            |
|                                                           | MD2_DLPFC_M  | 2010 | HG-U133 Plus 2 | 28(14/14)                      | Dr. Sibille            |
|                                                           | MD2_DLPFC_F  | 2010 | HG-U133 Plus 2 | 32(16/16)                      | Dr. Sibille            |
|                                                           | MD3_AMY      | 2009 | HumanHT-12     | 42(21/21)                      | Dr. Sibille            |
| Lung Disease<br>Studies (IPF)                             | Pardo        | 2005 | Codelink       | 24(13/11)                      | GSE2052                |
|                                                           | Yang         | 2007 | Agilent 43K    | 29(20/9)                       | GSE5774                |
|                                                           | Vuga         | 2009 | Codelink       | 7(4/3)                         | GSE10921               |
|                                                           | Konishi      | 2009 | Agilent 4x44K  | 38(23/15)                      | GSE10667               |
|                                                           | KangA        | 2011 | Agilent 4x44K  | 63(52/11)                      | Dr. Kaminski           |
|                                                           | KangB        | 2011 | Agilent 8x60K  | 96(75/21)                      | Dr. Kaminski           |
|                                                           | Larsson      | 2008 | HG-U133 Plus 2 | 12(6/6)                        | GSE11196               |
|                                                           | Emblom       | 2010 | cDNA           | 58(38/20)                      | GSE17978               |
| Breast Cancer<br>Studies                                  | Loi          | 2007 | HG-U133A       | 125                            | GSE6532                |
|                                                           | Miller       | 2005 | HG-U133A,B     | 236                            | GSE3494                |
|                                                           | Pawitan      | 2005 | HG-U133A,B     | 159                            | GSE1456                |
|                                                           | Sotiriou2006 | 2006 | HG-U133A       | 187                            | GSE2990                |
|                                                           | Desmedt      | 2007 | HG-U133A       | 198                            | GSE7390                |
|                                                           | Wang         | 2005 | HG-U133A       | 286                            | GSE2034                |
|                                                           | Sotiriou2003 | 2003 | cDNA           | 110                            |                        |
|                                                           | vantVeer     | 2002 | cDNA           | 97                             |                        |

Table S2: MetaQC results

| Data set                                         | Study           | IQC   | EQC   | CQC <sub>g</sub> | CQC <sub>p</sub> | AQC <sub>g</sub> | AQC <sub>p</sub> | Rank |
|--------------------------------------------------|-----------------|-------|-------|------------------|------------------|------------------|------------------|------|
| Prostate Cancer Studies (Normal v.s Primary)     | 1. Welsh        | 4.38  | 0.53* | 54.63            | 64.08            | 18.9             | 39.09            | 2.25 |
|                                                  | 2. Yu           | 6.64  | 0.9*  | 46.91            | 55.48            | 14.84            | 26.2             | 2.33 |
|                                                  | 3. Lapointe     | 2.1*  | 1.33* | 27               | 53.98            | 6.28             | 18.29            | 3.17 |
|                                                  | 4. Singh        | 1.14* | 0.95* | 14.67            | 19.21            | 3.85             | 18.34            | 4.17 |
|                                                  | 5. Varambally   | 4.38  | 1.06* | 8.7              | 3.29             | 2.55             | 2.41             | 4.92 |
|                                                  | 6. Wallace      | 7.86  | 0.27* | 0*               | 27.05            | 0*               | 3.69             | 5.33 |
|                                                  | 7. Nanni        | 0.75* | 0.7*  | 0.88*            | 4.2              | 0.63*            | 11.45            | 5.83 |
| Prostate Cancer Studies (Primary v.s Metastasis) | 1. Varambally   | 6.4   | 0.27* | 16.88            | 23.86            | 5.5              | 11.66            | 1.5  |
|                                                  | 2. Yu           | 4.74  | 0.94* | 6.77             | 13.73            | 1.43*            | 6.4              | 2    |
|                                                  | 3. Lapointe     | 3.3   | 0.8*  | 2.91             | 4.08             | 2.95             | 5.95             | 2.67 |
|                                                  | 4. Tomlins      | 1.3*  | 0.51* | 0.21*            | 0.21*            | 0.1*             | 0.41*            | 3.83 |
| Brain Cancer Studies                             | 1. Sun          | 4.96  | 2.64  | 151.63           | 128.5            | 61.12            | 48.82            | 1.5  |
|                                                  | 2. Petalidis    | 4.24  | 1.17* | 148.97           | 122.39           | 56.74            | 75.83            | 2.83 |
|                                                  | 3. Freije       | 5.27  | 2.52  | 89.34            | 68.09            | 43.31            | 20.49            | 3    |
|                                                  | 4. Phillips     | 4.81  | 1.73* | 84.93            | 56               | 37.22            | 25.31            | 3.83 |
|                                                  | 5. Gravendeel   | 6.27  | 1.13* | 38.53            | 48.98            | 11.9             | 35.74            | 4.17 |
|                                                  | 6. Paugh        | 1.51* | 1.26* | 1.62*            | 0.17*            | 1.7*             | 1.77*            | 6    |
|                                                  | 7. Yamanaka     | 0.1*  | 0.56* | 0.92*            | 0.94*            | 1.85*            | 0.31*            | 6.67 |
| MDD Studies                                      | 1. MD2_ACC_F    | 8.48  | 1.08* | 34.48            | 54.49            | 11.9             | 10.6             | 1.83 |
|                                                  | 2. MD2_DLPFC_F  | 7.87  | 1.13* | 34.58            | 32.29            | 6.33             | 6.91             | 2.67 |
|                                                  | 3. MD2_DLPFC_M  | 2.55  | 2.08* | 24.36            | 46.97            | 3.54             | 20.54            | 3    |
|                                                  | 4. MD1_ACC_M    | 5.03  | 0.45* | 23.25            | 50.38            | 4.29             | 10.74            | 3.67 |
|                                                  | 5. MD3_ACC_F    | 0.74* | 1.05* | 9.33             | 9.31             | 4.8              | 4.62             | 5.5  |
|                                                  | 6. MD2_ACC_M    | 2.99  | 1.04* | 7.41             | 9.4              | 3.36             | 0.96*            | 5.83 |
|                                                  | 7. MD1_AMY_M    | 1.97* | 0.11* | 5.47             | 23.76            | 1.93*            | 7.83             | 6.17 |
|                                                  | 8. MD3_AMY_F    | 1.56* | 0.96* | 0.96*            | 0.15*            | 0.38*            | 2.31             | 7.33 |
| Lung Disease Studies (IPF)                       | 1. KangA        | 6.64  | 0.34* | 140.41           | 85.47            | 39.01            | 40.71            | 2.17 |
|                                                  | 2. KangB        | 5.46  | 0.64* | 94.08            | 45.06            | 27.4             | 22.56            | 2.33 |
|                                                  | 3. Konishi      | 6.76  | 0.77* | 17.99            | 31.45            | 5.99             | 21.42            | 3    |
|                                                  | 4. Yang         | 4.07  | 0.44* | 26.61            | 23.7             | 9.57             | 18.41            | 4.17 |
|                                                  | 5. Pardo        | 4.44  | 0.35* | 15.6             | 29.98            | 14.56            | 17.09            | 4.5  |
|                                                  | 6. Vuga         | 2.28  | 0.39* | 1.41*            | 17.32            | 1.02*            | 14.5             | 6    |
|                                                  | 7. Larsson      | 1.85* | 1.32* | 0.54*            | 4.83             | 0.12*            | 1.26*            | 6.33 |
|                                                  | 8. Emblom       | 0.03* | 0.19* | 1.68*            | 0.07*            | 0.68*            | 0.56*            | 7.5  |
| Breast Cancer Studies                            | 1. Pawitan      | 3.63  | 4     | 29.79            | 116.82           | 21.99            | 83.85            | 2.25 |
|                                                  | 2. Loi          | 6.64  | 4     | 13.9             | 66.34            | 7.32             | 62.05            | 2.58 |
|                                                  | 3. Sotiriou2006 | 1.3*  | 0.38* | 49.91            | 134.6            | 14.3             | 72.17            | 3.33 |
|                                                  | 4. Miller       | 6.14  | 4     | 7.64             | 47.17            | 4.24             | 30.76            | 3.58 |
|                                                  | 5. Desmedt      | 6.26  | 4     | 5.09             | 14.94            | 3.24             | 17.21            | 4.42 |
|                                                  | 6. Wang         | 6.03  | 3.52  | 0.75*            | 25.72            | 2.48             | 26.01            | 5.17 |
|                                                  | 7. Sotiriou2003 | 2.15* | 1.37* | 0.28*            | 4.62             | 0.07*            | 2.58             | 6.83 |
|                                                  | 8. vantVeer     | 0.03* | 0.26* | 0.14*            | 1.83*            | 0.15*            | 0.8*             | 7.83 |

Table S3: Data sets and number of matched genes

| Disease                             | # of studies | # of studies passed MetaQC | Comparison                            | # of matched genes |
|-------------------------------------|--------------|----------------------------|---------------------------------------|--------------------|
| Prostate cancer                     | 7            | 6                          | Binary (normal vs. primary)           | 6,940              |
| Prostate cancer                     | 4            | 3                          | Binary (primary vs. metastastasis)    | 4,260              |
| Brain cancer                        | 7            | 5                          | Binary (AA vs. GBM) (AA vs. GBM)      | 6,019              |
| Major Deoressive Disorder (MDD)     | 8            | 6                          | Binary (Normal vs. MDD)               | 6,000              |
| Idiopathic Pulmonary Fibrosis (IPF) | 8            | 6                          | Binary (Normal vs. IPF)               | 5,481              |
| Breast cancer                       | 8            | 6                          | Survival time (Relapse free survival) | 10,688             |

Based on the QC, the study "Nanni" was removed from 7 prostate cancer studies comparing normal and primary cancer patients; the study "Tomlins" was removed from 4 prostate cancer studies comparing primary cancer patients and metastasis cancer patients. In the 7 brain cancer studies, the "Paugh" and "Yamanaka" studies were removed. In the case of major depression disorder (MDD) studies, we removed the study "MD3 AMY F". Studies "Larsson" and "Em-blom" were removed from 8 lung disease studies. In breast cancer survival data sets, two cDNA data sets "Sotiriou2003" and "vantVeer" were removed.

Table S4: Mean standardized rank (MSR) and aggregated standardized rank (ASR) for detection capability

|                                           | Fisher | AW   | Stouffer | minP | FEM  | RankSum | rOP  | RankProd | maxP | REM  | SR   | PR   |
|-------------------------------------------|--------|------|----------|------|------|---------|------|----------|------|------|------|------|
| Prostate cancer (normal v.s. primary)     | 0.08   | 0.17 | 0.25     | 0.34 | 0.42 | 0.51    | 0.63 | 0.61     | 0.78 | 0.80 | 0.98 | 0.93 |
| Prostate cancer (primary v.s. metastasis) | 0.08   | 0.17 | 0.25     | 0.33 | 0.55 | 0.45    | 0.51 | 0.71     | 0.70 | 0.83 | 0.92 | 1.00 |
| Brain cancer (AA v.s. GBM)                | 0.08   | 0.17 | 0.27     | 0.40 | 0.40 | 0.54    | 0.57 | 0.65     | 0.75 | 0.75 | 0.92 | 1.00 |
| MDD                                       | 0.17   | 0.22 | 0.26     | 0.51 | 0.55 | 0.48    | 0.49 | 0.52     | 0.72 | 0.83 | 0.85 | 0.90 |
| IPF                                       | 0.08   | 0.17 | 0.27     | 0.32 | 0.42 | 0.49    | 0.67 | 0.60     | 0.81 | 0.76 | 0.97 | 0.95 |
| Breast Cancer                             | 0.13   | 0.33 | 0.41     | 0.38 | NA   | NA      | 0.63 | NA       | 0.75 | NA   | 0.99 | 0.89 |
| Aggregated standardized ranks             | 0.11   | 0.20 | 0.29     | 0.38 | 0.47 | 0.49    | 0.58 | 0.62     | 0.75 | 0.79 | 0.94 | 0.95 |

Table S5: Mean standardized rank (MSR) and aggregated standardized rank (ASR) for biological association

|                                           | Stouffer | Fisher | AW   | PR   | rOP  | SR   | minP | RankProd | FEM  | maxP | REM  | RankSum |
|-------------------------------------------|----------|--------|------|------|------|------|------|----------|------|------|------|---------|
| Prostate cancer (normal v.s. primary)     | 0.42     | 0.38   | 0.38 | 0.41 | 0.44 | 0.53 | 0.49 | 0.58     | 0.63 | 0.69 | 0.75 | 0.80    |
| Prostate cancer (primary v.s. metastasis) | 0.36     | 0.38   | 0.39 | 0.42 | 0.36 | 0.52 | 0.49 | 0.55     | 0.68 | 0.72 | 0.78 | 0.86    |
| Brain cancer (AA v.s. GBM)                | 0.44     | 0.45   | 0.40 | 0.54 | 0.42 | 0.64 | 0.47 | 0.50     | 0.56 | 0.65 | 0.72 | 0.73    |
| MDD                                       | 0.27     | 0.29   | 0.40 | 0.28 | 0.42 | 0.28 | 0.56 | 0.68     | 0.80 | 0.84 | 0.81 | 0.88    |
| IPF                                       | 0.35     | 0.41   | 0.36 | 0.40 | 0.45 | 0.48 | 0.52 | 0.63     | 0.66 | 0.72 | 0.76 | 0.78    |
| Breast Cancer                             | 0.45     | 0.45   | 0.48 | 0.42 | 0.52 | 0.56 | 0.71 | NA       | NA   | 0.92 | NA   | NA      |
| Aggregated standardized ranks             | 0.38     | 0.39   | 0.40 | 0.41 | 0.43 | 0.50 | 0.54 | 0.59     | 0.67 | 0.75 | 0.76 | 0.81    |

Table S6: Mean standardized rank (MSR) and aggregated standardized rank (ASR) for stability

|                                           | RankProd | RankSum | Fisher | PR   | REM  | AW   | minP | Stouffer | SR   | rOP  | FEM  | maxP |
|-------------------------------------------|----------|---------|--------|------|------|------|------|----------|------|------|------|------|
| Prostate cancer (normal v.s. primary)     | 0.08     | 0.17    | 0.40   | 0.38 | 0.27 | 0.46 | 0.70 | 0.72     | 0.71 | 0.92 | 0.70 | 1.00 |
| Prostate cancer (primary v.s. metastasis) | 0.08     | 0.17    | 0.38   | 0.43 | 0.35 | 0.39 | 0.58 | 0.66     | 0.73 | 0.84 | 0.90 | 1.00 |
| Brain cancer (AA v.s. GBM)                | 0.08     | 0.17    | 0.37   | 0.40 | 0.30 | 0.50 | 0.74 | 0.68     | 0.77 | 0.67 | 0.83 | 1.00 |
| MDD                                       | 0.04     | 0.04    | 0.23   | 0.19 | 0.82 | 0.45 | 0.45 | 0.58     | 0.36 | 0.67 | 0.78 | 0.90 |
| IPF                                       | 0.08     | 0.17    | 0.38   | 0.44 | 0.32 | 0.52 | 0.49 | 0.61     | 0.76 | 0.92 | 0.82 | 1.00 |
| Breast Cancer                             | NA       | NA      | 0.18   | 0.32 | NA   | 0.50 | 0.51 | 0.59     | 0.70 | 0.80 | NA   | 0.89 |
| Aggregated standardized ranks             | 0.07     | 0.14    | 0.32   | 0.36 | 0.41 | 0.47 | 0.58 | 0.64     | 0.67 | 0.80 | 0.81 | 0.97 |

Table S7: Mean standardized rank (MSR) and aggregated standardized rank (ASR) for robustness

|                                           | minP | AW   | Fisher | Stouffer | RankProd | PR   | SR   | REM  | FEM  | rOP  | maxP | RankSum |
|-------------------------------------------|------|------|--------|----------|----------|------|------|------|------|------|------|---------|
| Prostate cancer (normal v.s. primary)     | 0.20 | 0.27 | 0.23   | 0.34     | 0.56     | 0.52 | 0.54 | 0.59 | 0.65 | 0.80 | 0.79 | 1.00    |
| Prostate cancer (primary v.s. metastasis) | 0.17 | 0.21 | 0.24   | 0.33     | 0.47     | 0.53 | 0.65 | 0.65 | 0.70 | 0.81 | 0.79 | 0.94    |
| Brain cancer (AA v.s. GBM)                | 0.24 | 0.29 | 0.31   | 0.40     | 0.52     | 0.54 | 0.59 | 0.63 | 0.57 | 0.76 | 0.71 | 0.94    |
| MDD                                       | 0.55 | 0.51 | 0.56   | 0.59     | 0.33     | 0.47 | 0.37 | 0.55 | 0.52 | 0.49 | 0.58 | 0.97    |
| IPF                                       | 0.21 | 0.31 | 0.29   | 0.35     | 0.47     | 0.49 | 0.62 | 0.51 | 0.74 | 0.76 | 0.73 | 1.00    |
| Breast Cancer                             | 0.57 | 0.60 | 0.62   | 0.51     | NA       | 0.49 | 0.62 | NA   | NA   | 0.40 | 0.70 | NA      |
| Aggregated standardized ranks             | 0.32 | 0.37 | 0.37   | 0.42     | 0.47     | 0.51 | 0.57 | 0.59 | 0.64 | 0.67 | 0.72 | 0.97    |
